# Supplementary material for: Sub-5 nm SnO2 chemically coupled hollow carbon spheres for efficient electrocatalytic CO2 reduction
Source: Royal Society of Chemistry journal article supplement (doi:10.1039/c8ta08058e), 2018-01-01
Supplement: c8ta08058e1.pdf [file c8ta08058e1.pdf]

*Supporting Information for*

# Sub-5 nm SnO<sub>2</sub> Chemically Coupled Hollow Carbon Spheres for Efficient Electrocatalytic CO<sub>2</sub> Reduction

*Yiliguma,<sup>a</sup> Zhijie Wang,<sup>a</sup> Chao Yang,<sup>a</sup> Anxiang Guan,<sup>a</sup> Longmei Shang,<sup>a</sup> Abdullah M. Al-Enizi,<sup>b</sup>*

*Lijuan Zhang,<sup>a</sup> Gengfeng Zheng<sup>\*a</sup>*

<sup>a</sup>Laboratory of Advanced Materials, Department of Chemistry and Shanghai Key Laboratory of Molecular Catalysis and Innovative Materials, Fudan University, Shanghai 200438, China

<sup>b</sup>Department of Chemistry, College of Science, King Saud University, Riyadh 11451, Saudi Arabia

\* Corresponding author E-mail: gfzheng@fudan.edu.cn

**Table S1.** Summary of our and previously reported tin oxide based catalytic CO<sub>2</sub>RR.

| Catalyst                                                                       | Electrochemical conditions                                                                                                                                                        | CO <sub>2</sub> RR | Highest activity                                                                                                                  | CO <sub>2</sub> RR | Stability                                                                     | Active sites regarding oxidation states                                                            | Sn | Loading of SnO <sub>x</sub>                                                 | Ref.      |
|--------------------------------------------------------------------------------|-----------------------------------------------------------------------------------------------------------------------------------------------------------------------------------|--------------------|-----------------------------------------------------------------------------------------------------------------------------------|--------------------|-------------------------------------------------------------------------------|----------------------------------------------------------------------------------------------------|----|-----------------------------------------------------------------------------|-----------|
| SnO <sub>2</sub> /C                                                            | H-cell, CO <sub>2</sub> sat. 0.1 M KHCO <sub>3</sub> aqueous solution, pH 6.8                                                                                                     |                    | FE (HCOO <sup>-</sup> ): ~ 54% (-3.7 mA cm <sup>-2</sup> ), FE (CO): ~ 22% (-1.4 mA cm <sup>-2</sup> ) @ -0.9 V vs RHE            |                    | After 12 h @ -0.9 V vs RHE, FE (HCOO <sup>-</sup> ) decreased from 64% to 49% | SnO <sub>2</sub> (JCPDS #41-1445), SnO (JCPDS #07-0195)                                            |    | SnO <sub>2</sub> : 0.07 mg cm <sup>-2</sup>                                 | This work |
| Sn/SnO <sub>x</sub> film                                                       | H-cell, CO <sub>2</sub> sat. 0.5 M NaHCO <sub>3</sub> aqueous solution                                                                                                            |                    | FE (CO): ~ 5-10% and FE (HCOOH): ~ 19% @ -0.7 V vs RHE (j <sub>tot</sub> -0.4 ~ -0.6 mA cm <sup>-2</sup> )                        |                    | /                                                                             | Sn/SnO <sub>x</sub> interface or SnO <sub>x</sub> surface (SnO <sub>x</sub> JCPDS # not specified) |    | /                                                                           | S1        |
| Hierarchical mesoporous SnO <sub>2</sub> Nanosheets on carbon cloth            | H-cell, CO <sub>2</sub> sat. 0.5 M NaHCO <sub>3</sub> aqueous solution, pH 7.2                                                                                                    |                    | FE (HCOO <sup>-</sup> ): 87% @ -1.6 V vs Ag/AgCl (3 M KCl) (j <sub>tot</sub> -50 mA cm <sup>-2</sup> )                            |                    | After 24 h @ -1.6 V vs Ag/AgCl (3 M KCl) FE (HCOO <sup>-</sup> ): 87%         | Sn or Sn/SnO <sub>x</sub>                                                                          |    | SnO <sub>2</sub> (JCPDS #41-1445): 0.34 mg cm <sup>-2</sup>                 | S2        |
| SnO <sub>2</sub> nanoparticles on carbon aerogels                              | Gas diffusion electrode, H-cell, CO <sub>2</sub> sat. 1.0 M KHCO <sub>3</sub> aqueous solution, pH 7.5                                                                            |                    | FE (HCOO <sup>-</sup> ): ~76% @ -0.96 V vs RHE (j <sub>tot</sub> -14 ~ -17 mA cm <sup>-2</sup> )                                  |                    | After 12 h @ -0.96 V vs RHE FE (HCOO <sup>-</sup> ): 66%                      | /                                                                                                  |    | SnO <sub>2</sub> (JCPDS #41-1445): 0.56 mg cm <sup>-2</sup>                 | S3        |
| SnO <sub>2</sub> nanoparticles on carbon black                                 | H-cell, CO <sub>2</sub> sat. 0.1 M NaHCO <sub>3</sub> aqueous solution                                                                                                            |                    | FE (HCOO <sup>-</sup> ): 86.2% @ -1.8 V vs SCE (j <sub>tot</sub> -5.4 mA cm <sup>-2</sup> )                                       |                    | /                                                                             | /                                                                                                  |    | SnO <sub>2</sub> (Rutile): 0.015 mg cm <sup>-2</sup>                        | S4        |
| SnO <sub>2</sub> nanoparticles on reduced graphene oxide                       | H-cell, CO <sub>2</sub> sat. 0.1 M NaHCO <sub>3</sub> aqueous solution                                                                                                            |                    | FE (HCOO <sup>-</sup> ): 93.6% @ -1.8 V vs SCE (j <sub>tot</sub> -10.2 mA cm <sup>-2</sup> )                                      |                    | /                                                                             | /                                                                                                  |    | SnO <sub>2</sub> (Rutile): 0.015 mg cm <sup>-2</sup>                        | S5        |
| SnO <sub>x</sub> / gas diffusion layer                                         | H-cell, CO <sub>2</sub> sat. 0.5 M KHCO <sub>3</sub> aqueous solution                                                                                                             |                    | FE (HCOO <sup>-</sup> ): 87.1% @ -1.6 V vs SHE (j <sub>tot</sub> -10 mA cm <sup>-2</sup> )                                        |                    | After 20 h @ -1.6 V vs SHE FE (HCOO <sup>-</sup> ): 70.2%                     | SnO <sub>2</sub> (JCPDS #46-1088), SnO (JCPDS #06-0395)                                            |    | SnO <sub>x</sub> : 3 mg cm <sup>-2</sup>                                    | S5        |
| SnO nanoparticles on carbon                                                    | H-cell, CO <sub>2</sub> sat. 0.5 M KHCO <sub>3</sub> aqueous solution                                                                                                             |                    | FE (CO): 37% (5 mA cm <sup>-2</sup> ) @ -0.66 V vs RHE; FE (HCOO <sup>-</sup> ): ~ 65% (25 mA cm <sup>-2</sup> ) @ -0.86 V vs RHE |                    | After 24 h @ -0.66 V vs RHE FE (CO): 30~40%, FE (HCOO <sup>-</sup> ): 36%     | Ultra small Sn nanoparticles (JCPDS #04-0673)                                                      |    | SnO (JCPDS #06-0395): 0.14 mg cm <sup>-2</sup>                              | S6        |
| Sn <sub>6</sub> O <sub>4</sub> (OH) <sub>2</sub> nanoparticles on carbon black | Custom made cell capable of in situ AT-IR spectroscopic measurement during CO <sub>2</sub> RR, CO <sub>2</sub> sat. 0.1 M K <sub>2</sub> SO <sub>4</sub> aqueous solution, pH 4.4 |                    | FE (HCOO <sup>-</sup> ): 70% @ -1.8 V vs RHE (current density not specified)                                                      |                    | /                                                                             | Sn <sup>2+</sup> oxyhydroxide (JCPDS #46-1486)                                                     |    | Sn <sub>6</sub> O <sub>4</sub> (OH) <sub>2</sub> : 0.57 mg cm <sup>-2</sup> | S7        |
| SnO <sub>2</sub> nanoparticles                                                 | Cell capable of in operando                                                                                                                                                       |                    | FE (HCOO <sup>-</sup> ): ~80% in a                                                                                                |                    | /                                                                             | SnO <sub>2</sub> (JCPDS #41-                                                                       |    | 0.5 mg cm <sup>-2</sup>                                                     | S8        |

|                       |                |                                                                  |                                                                         |       |                         |
|-----------------------|----------------|------------------------------------------------------------------|-------------------------------------------------------------------------|-------|-------------------------|
| <b>on</b>             | <b>reduced</b> | Raman spectroscopic study during                                 | potential range around                                                  | 1445) | (including              |
| <b>graphene oxide</b> |                | CO <sub>2</sub> RR, CO <sub>2</sub> dissolved 0.5 M NaOH, pH 9.7 | from -0.9 to -1.2 V vs Ag/AgCl (3 M KCl)                                |       | reduced graphene oxide) |
|                       |                |                                                                  | ( <i>j</i> <sub>tot</sub> -4.7 mA cm <sup>-2</sup> @ -1.5 V vs Ag/AgCl) |       |                         |

**Table S2.** Summary of Sn 3d, O 1s and C 1s binding energies and Sn:O atomic ratios in SnO<sub>2</sub>/C and SnO<sub>x</sub> hollow spheres.

|                     |                      | SnO <sub>x</sub> | C     | SnO <sub>2</sub> /C |
|---------------------|----------------------|------------------|-------|---------------------|
| Binding Energy / eV | Sn 3d <sub>5/2</sub> | 486.5            | -     | 487.6               |
|                     | O 1s                 | 530.4            | 533.6 | 532.0               |
|                     | C 1s                 | -                | 284.8 | 284.8               |
| Molar Ratio         | Sn:O                 | 1:2.7            | -     | 1:6.0               |
|                     | Sn:O <sub>Latt</sub> | 1:1.0            | -     | 1:0.16              |

## Methods

### Calculation of ratio of turnover frequencies

$$TOF = \frac{J}{n \times N \times 1.602 \times 10^{-19}} \quad (J: \text{catalytic current density, } n: \text{the numbers of electrons involved in the electrochemical reaction, } N \text{ the areal density of active sites})^{S9}$$

In our experiment, SnO<sub>2</sub>/C and SnO<sub>x</sub> are active for CO<sub>2</sub>RR to produce formate and CO, both of which are 2 electron transfer reactions. Thus,

$$\frac{TOF_{SnO_2/C}}{TOF_{SnO_x}} = \frac{J_{SnO_2/C} \times N_{SnO_x}}{J_{SnO_x} \times N_{SnO_2/C}}$$

For heterogeneous catalysts, it is difficult to obtain the absolute value of N. Here, we do not consider the difference of crystalline structure between SnO<sub>2</sub>/C and SnO<sub>x</sub> (since they are similar) and assume SnO<sub>2</sub> and SnO<sub>x</sub> nanoparticles completely cover the surface of both hollow structures. Then, the ratio of their double layer capacitances would be the ratio of their ECSA as well as ratio of the numbers of their active sites. Thus,

$$\frac{TOF_{SnO_2/C}}{TOF_{SnO_x}} = \frac{J_{SnO_2/C} \times N_{SnO_x}}{J_{SnO_x} \times N_{SnO_2/C}} = \frac{J_{SnO_2/C} \times C_{dl\ SnO_x}}{J_{SnO_x} \times C_{dl\ SnO_2/C}}$$

At -0.9 *mA cm<sup>-2</sup>* under CO<sub>2</sub>RR condition, J<sub>CO<sub>2</sub>RR</sub> for SnO<sub>2</sub>/C and SnO<sub>x</sub> were -5.1 and 0.19 *mA cm<sup>-2</sup>*. Therefore,

$$\frac{TOF_{SnO_2/C}}{TOF_{SnO_x}} = \frac{J_{SnO_2/C} \times C_{dl\ SnO_x}}{J_{SnO_x} \times C_{dl\ SnO_2/C}} = \frac{5.1 \times 1}{0.19 \times 22} = 1.22$$

## Supplementary Figures

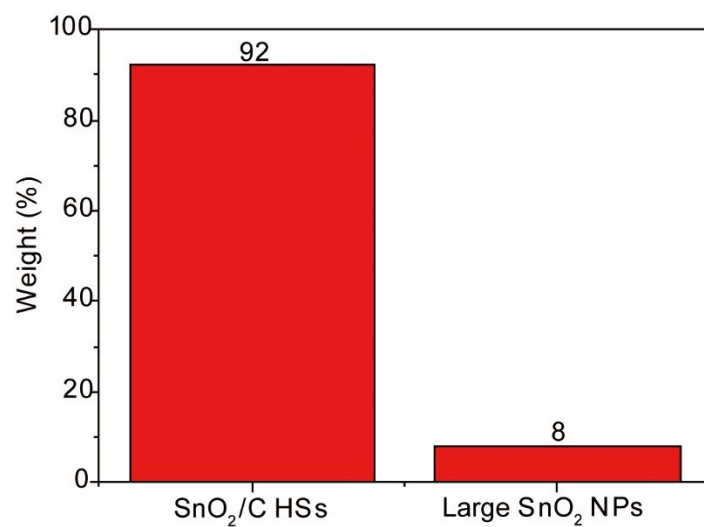

**Figure S1.** Estimated weight ratio of SnO<sub>2</sub> in SnO<sub>2</sub>/C hollow spheres and with large particle size by XRD analysis.

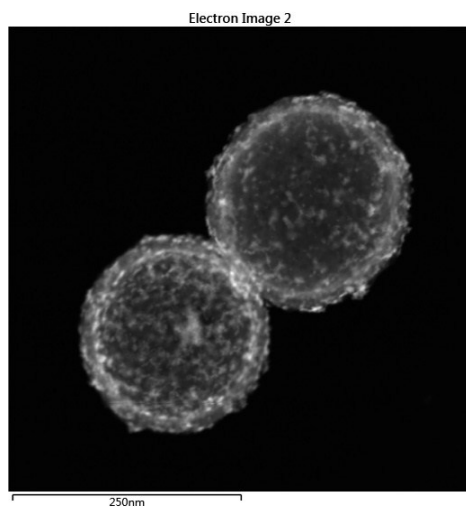

**Figure S2.** Dark-field STEM image of SnO<sub>2</sub>/C hollow spheres.

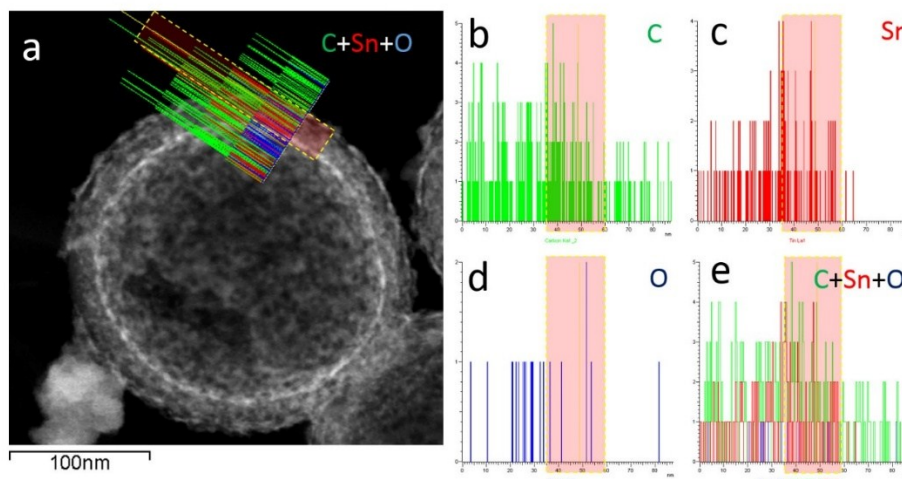

**Figure S3.** (a) Dark-field STEM image of one typical  $\text{SnO}_2/\text{C}$  hollow structure with the-line scan EDS across its wall. Yellow dashed rectangle area is put to highlight the elemental concentrations along direction of the wall thickness. Green (b), red (c) and blue (d) line heights indicate the concentrations of carbon, tin and oxygen elements. The superposition of the carbon, tin and oxygen signals in (e).

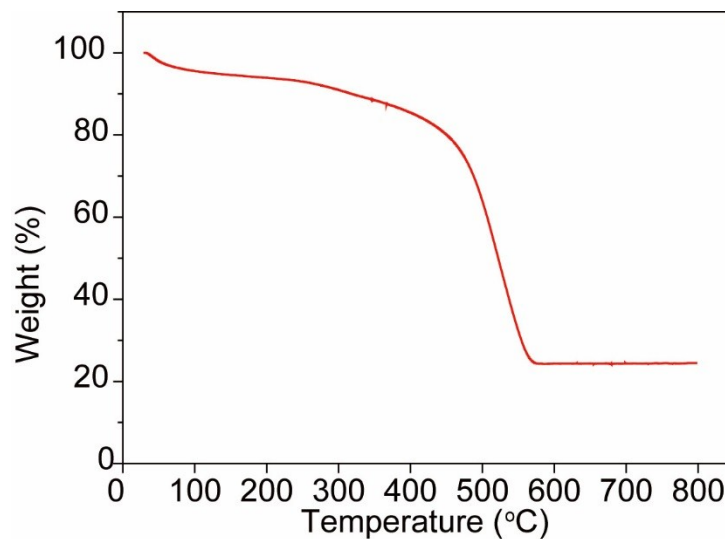

**Figure S4.** TGA curve of  $\text{SnO}_2/\text{C}$  hollow spheres under air with a ramp of 5 °C/min.

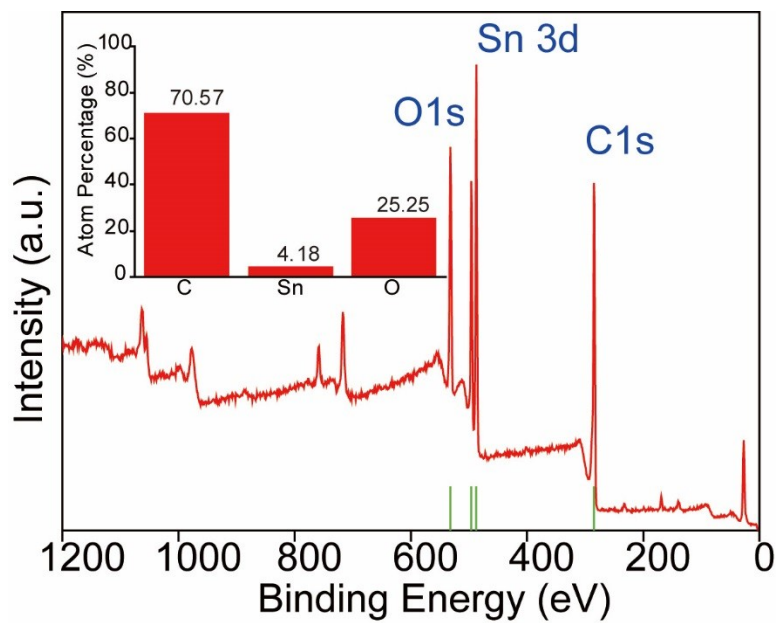

**Figure S5.** XPS wide spectrum of SnO<sub>2</sub>/C hollow spheres.

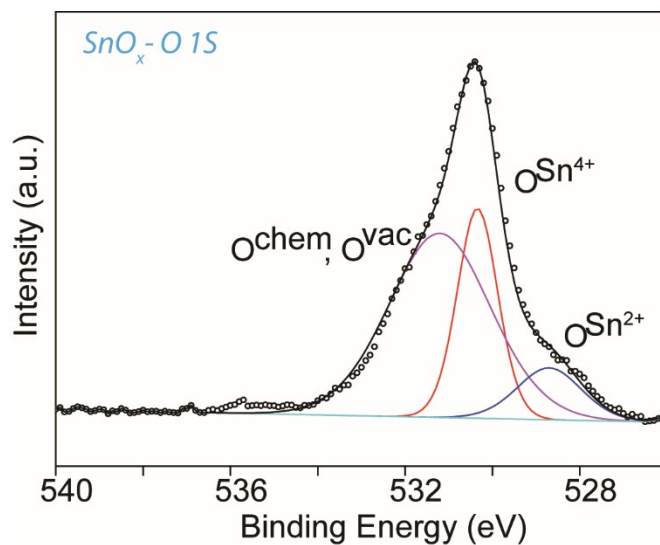

**Figure S6.** O 1s spectrum of SnO<sub>x</sub> hollow spheres.

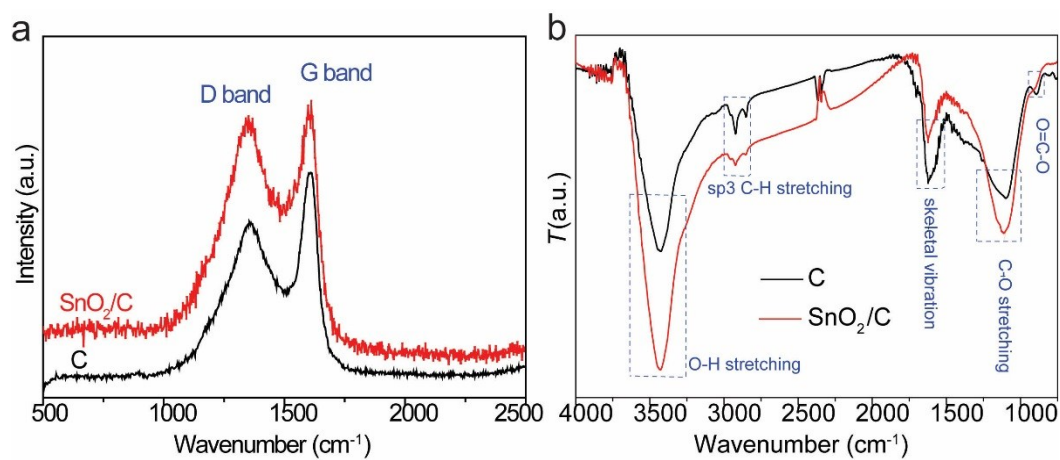

**Figure S7.** (a) Raman and (b) FT-IR spectra of SnO<sub>2</sub>/C and C hollow spheres.

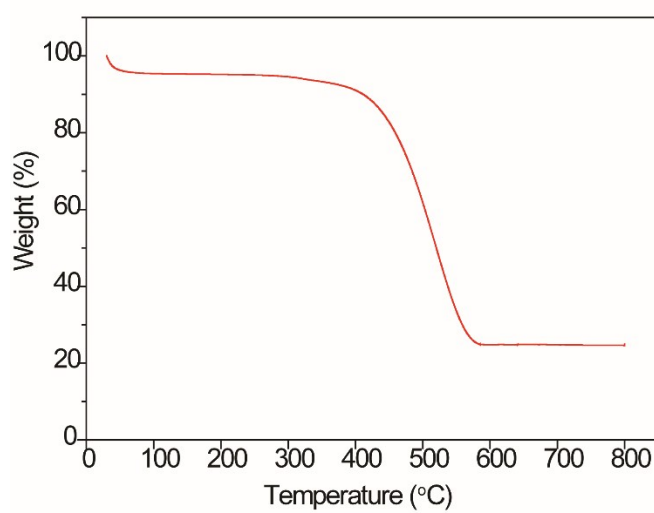

**Figure S8.** TGA curve of SnO<sub>2</sub>/rGO under air with a ramp of 5 °C/min.



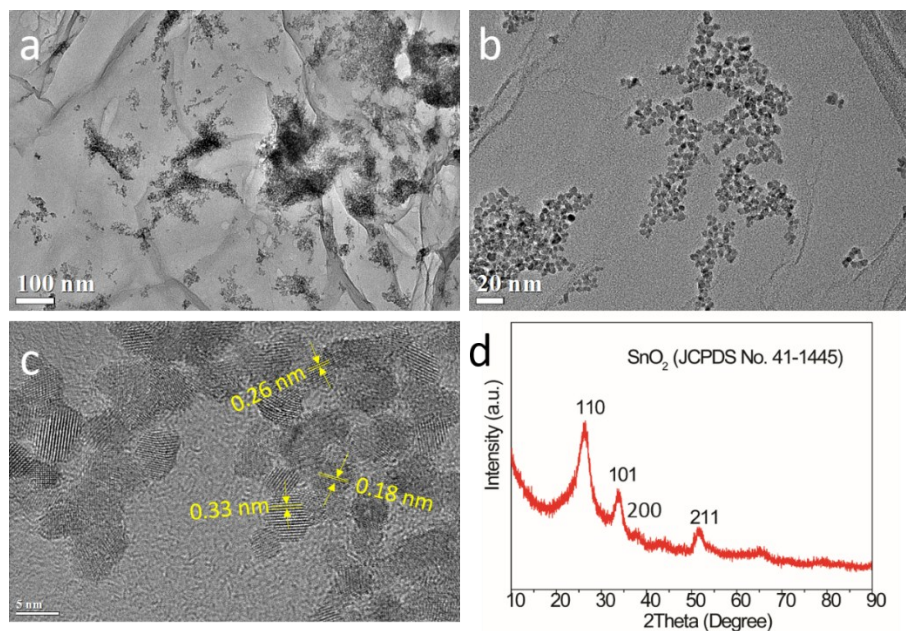

**Figure S9.** (a, b) TEM, (c) HRTEM and (d) XRD pattern images of SnO<sub>2</sub>/rGO sample.

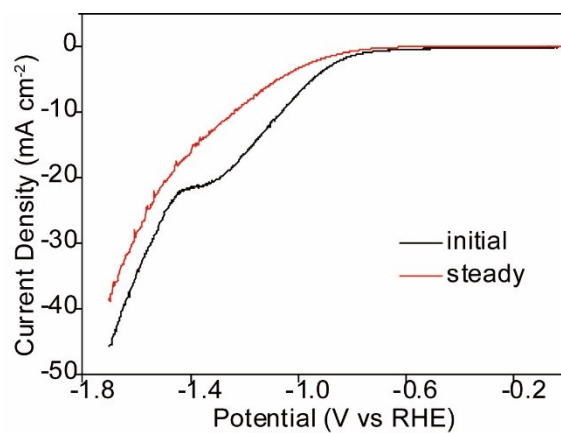

**Figure S10.** The first and second runs of LSV of SnO<sub>x</sub> hollow spheres in CO<sub>2</sub>-saturated 0.1 M KHCO<sub>3</sub> aqueous solution. The LSV curves after the second run are similar to the second one, therefore, we started CO<sub>2</sub>RR test after the second run of LSV.

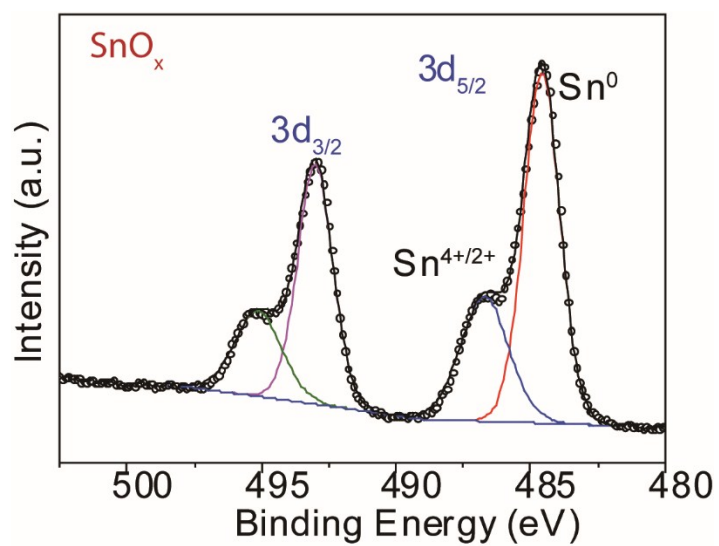

**Figure S11.** Sn 3d XPS spectrum of  $\text{SnO}_x$  hollow spheres after the first two runs of LSV.

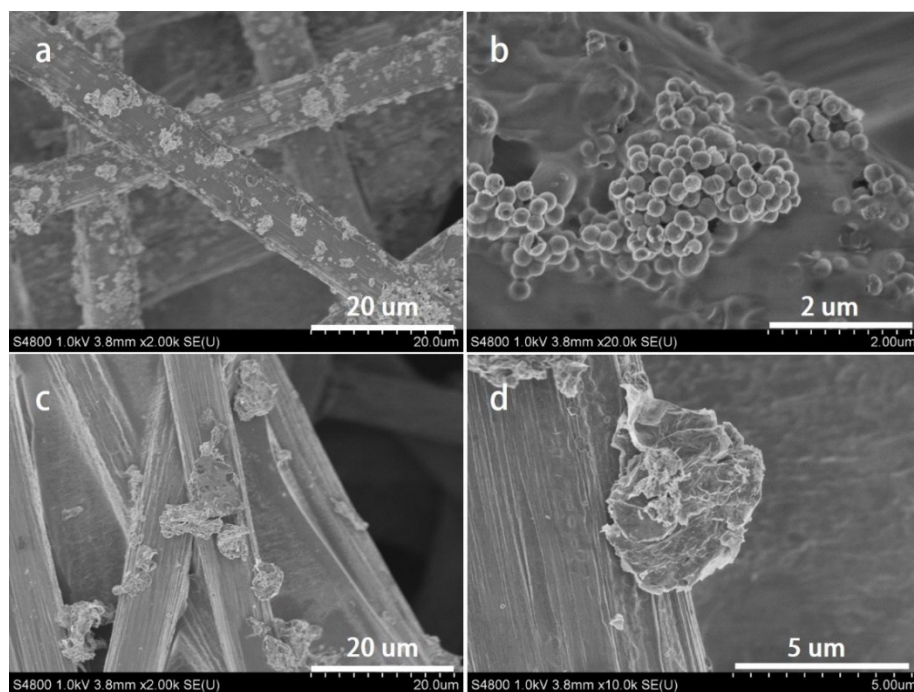

**Figure S12.** (a, b) SEM images of  $\text{SnO}_2/\text{C}$  hollow spheres and (c, d)  $\text{SnO}_2/\text{rGO}$  as catalysts on carbon paper electrode

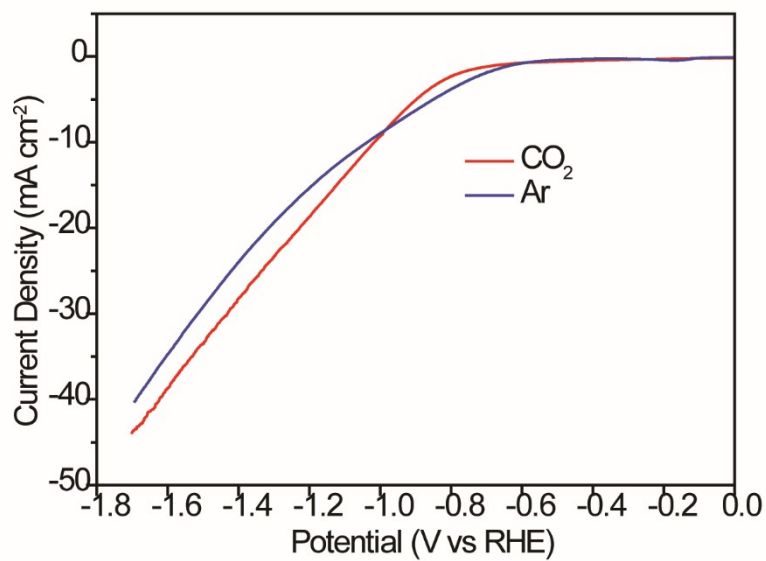

**Figure S13.** LSV curves of SnO<sub>2</sub>/C in CO<sub>2</sub>-saturated and Ar-saturated 0.1 M KHCO<sub>3</sub> aqueous solutions.

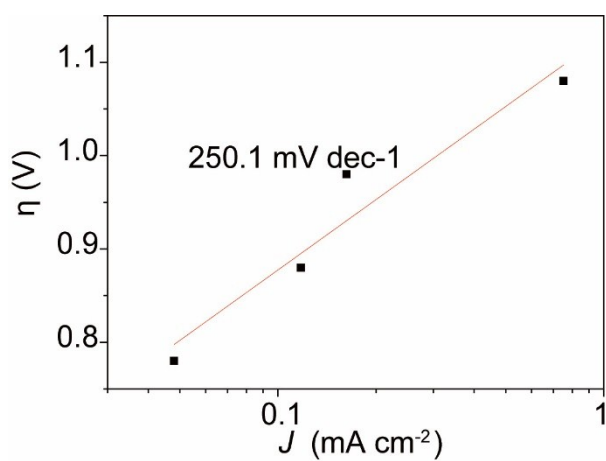

**Figure S14.** Tafel slope of CO<sub>2</sub>-to-formate reaction with SnO<sub>x</sub> hollow spheres.

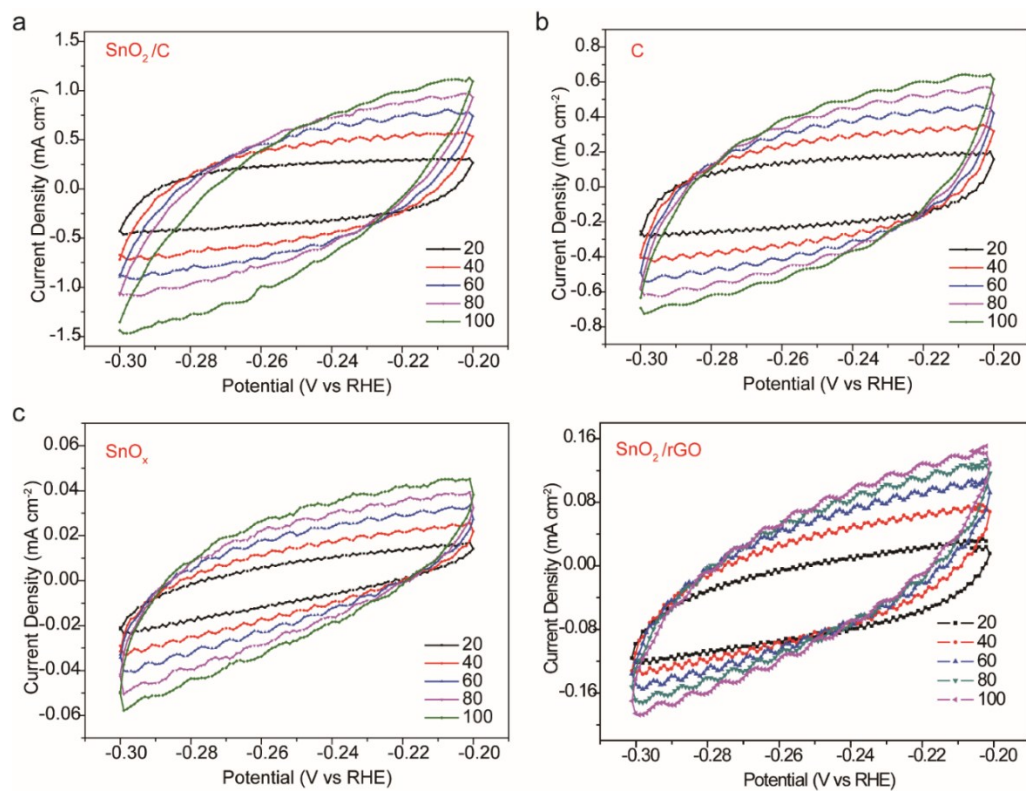

**Figure S15.** CV scans under different scan rates for (a) SnO<sub>2</sub>/C, (b) C, and (c) SnO<sub>x</sub> hollow spheres and SnO<sub>2</sub>/rGO.

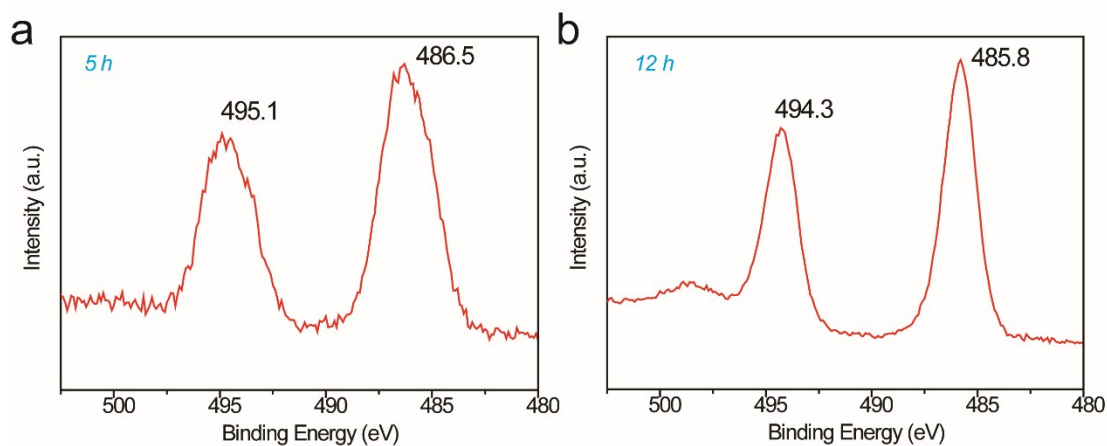

**Figure S16.** Sn 3d XPS spectrum of SnO<sub>2</sub>/C hollow spheres after (a) 5 h and (b) 12 h durability test at -0.9 V vs. RHE.



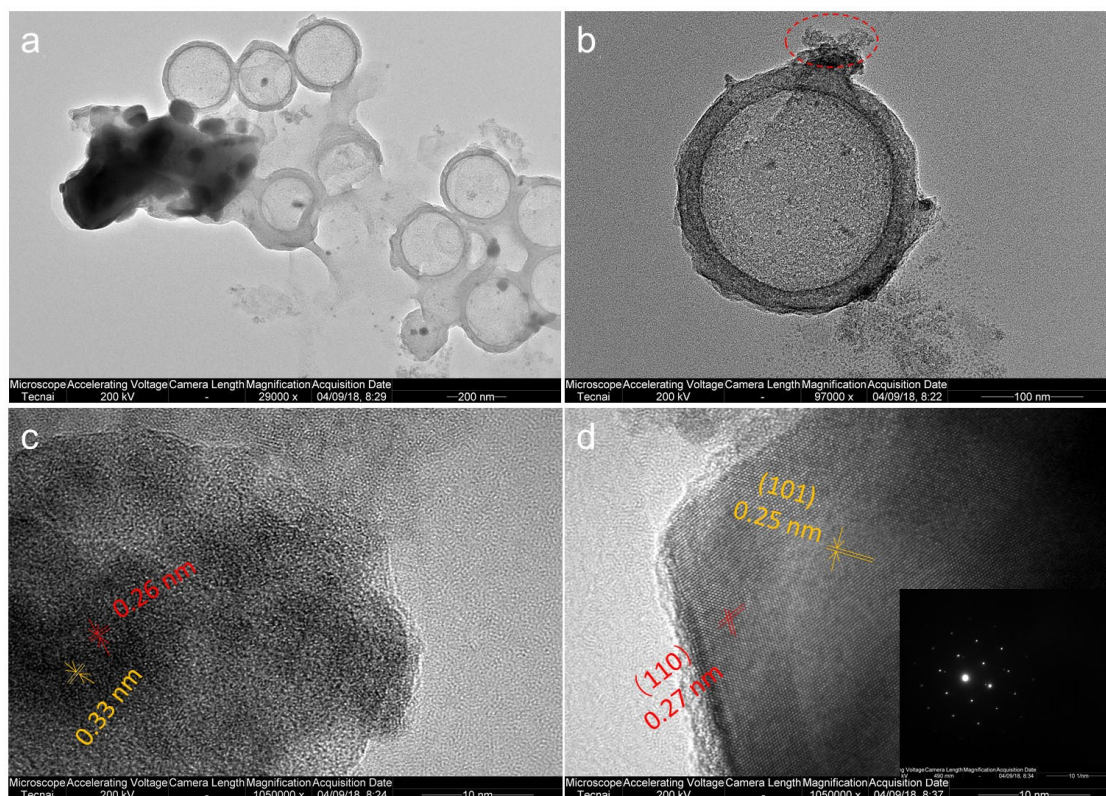

**Figure S17.** (a, b) TEM and (c, d) HRTEM images of  $\text{SnO}_2/\text{C}$  catalyst after 12 h durability test at  $-0.9$  V vs RHE. In Fig. S16 a, the phase separation between carbon and Sn was observed. While the carbon hollow structure was retained after the durability test (Fig. S16a, b), the  $\text{SnO}_x$  nanoparticles agglomerated (Fig. S16b, red dashed circle, and Fig. S16c) and partial  $\text{SnO}_x$  was reduced to large size tetragonal Sn single crystals (JCPDS no. 18-1380, Fig. S16d). Under consideration of Sn 3d XPS binding energy which is closer to  $\text{Sn}^{2+}$  than  $\text{Sn}^{4+}$ , the crystal fringe distances 0.33 and 0.26 nm were assigned to SnO (JCPDS no. 07-0195) in Fig. S16c.

## Reference

- S1. Chen, Y.; Kanan, M. W. Tin Oxide Dependence of the CO<sub>2</sub> Reduction Efficiency on Tin Electrodes and Enhanced Activity for Tin/Tin Oxide Thin-Film Catalysts. *J. Am. Chem. Soc.* **2012**, *134* (4), 1986-1989.
- S2. Li, F.; Chen, L.; Knowles, G. P.; MacFarlane, D. R.; Zhang, J. Hierarchical Mesoporous SnO<sub>2</sub> Nanosheets on Carbon Cloth: A Robust and Flexible Electrocatalyst for CO<sub>2</sub> Reduction with High Efficiency and Selectivity. *Angew. Chem. Int. Ed.* **2017**, *56* (2), 505-509.
- S3. Yu, J.; Liu, H.; Song, S.; Wang, Y.; Tsiakaras, P. Electrochemical Reduction of Carbon Dioxide at Nanostructured SnO<sub>2</sub>/Carbon Aerogels: The Effect of Tin Oxide Content on the Catalytic Activity and Formate Selectivity. *Appl. Catal. A: Gen.* **2017**, *545*, 159-166.
- S4. Zhang, S.; Kang, P.; Meyer, T. J. Nanostructured Tin Catalysts for Selective Electrochemical Reduction of Carbon Dioxide to Formate. *J. Am. Chem. Soc.* **2014**, *136* (5), 1734-1737.
- S5. Li, Y.; Qiao, J.; Zhang, X.; Lei, T.; Girma, A.; Liu, Y.; Zhang, J. Rational Design and Synthesis of SnO<sub>x</sub> Electrocatalysts with Coralline Structure for Highly Improved Aqueous CO<sub>2</sub> Reduction to Formate. *ChemElectroChem* **2016**, *3* (10), 1618-1628.
- S6. Gu, J.; Héroguel, F.; Luterbacher, J.; Hu, X. Densely Packed, Ultra Small SnO Nanoparticles for Enhanced Activity and Selectivity in Electrochemical CO<sub>2</sub> Reduction. *Angew. Chem. Int. Ed.* **2018**, *57* (11), 2943-2947.
- S7. Baruch, M. F.; Pander, J. E.; White, J. L.; Bocarsly, A. B., Mechanistic Insights into the

Reduction of CO<sub>2</sub> on Tin Electrodes using in Situ ATR-IR Spectroscopy. *ACS Catal.* **2015**, 5 (5), 3148-3156.

S8. Dutta, A.; Kuzume, A.; Rahaman, M.; Veszteg, S.; Broekmann, P., Monitoring the Chemical State of Catalysts for CO<sub>2</sub> Electroreduction: An In Operando Study. *ACS Catal.* **2015**, 5 (12), 7498-7502.

S9. Voiry, D.; Fullon, R.; Yang, J.; Silva, C. C. C.; Kappera, R.; Bozkurt, I.; Kaplan, D.; Lagos, M. J.; Batson, P. E.; Gupta, G.; Mohite, A. D.; Dong, L.; Er, D.; Shenoy, V.; Asefa, T.; Chhowalla, M., The Role of Electronic Coupling Between Substrate and 2D MoS<sub>2</sub> Nanosheets in Electrocatalytic Production of Hydrogen. *Nature Mater.* **2016**, 15, 1003-1010.
